# Supplementary material for: New Insights into Asian Prunus Viruses in the Light of NGS-Based Full Genome Sequencing
Source: PubMed Central journal article supplement (PMC4704818; doi:10.1371/journal.pone.0146420), 2016-01-07
Supplement: pone.0146420.s001.pdf [file pone.0146420.s001.pdf]

|                    |            |            |             |             |            |            |             |            |             |             |     |
|--------------------|------------|------------|-------------|-------------|------------|------------|-------------|------------|-------------|-------------|-----|
|                    | 1          |            |             |             |            |            |             |            |             |             | 100 |
| APV3_Nanjing       | TAGTCACCCA | GTCACCAGAG | GTTGAATATA  | AATGGTGATT  | AGCGTTCCCG | TAGCCGTTGA | GGGTGAAGCA  | ACGGAGCCTC | AATTCTATCT  | CTAAATGGGC  |     |
| APV3_TT25          | TAGCCACCAG | ATTGCAAGAA | GTTGTGCATG  | AAGGGTAGTT  | .....      | .....      | .....       | .....      | .....       | .....       |     |
| APV3_TT23_variant1 | TAGCCACCAG | ATTGCCTGGA | GTTG.....   | .....       | .....      | .....      | .....       | .....      | .....       | .....       |     |
| APV3_TT23_variant2 | TAGCCACCAG | ATTGCCTGGA | GTTGT.....  | .....       | .....      | .....      | .....       | .....      | .....       | .....       |     |
|                    | 101        |            |             |             |            |            |             |            |             |             | 200 |
| APV3_Nanjing       | TTTAAAGAAG | CTTAAAGTGT | CAATGGTGCA  | CCTCGGCAAG  | AGGTTTCCAG | ACAAGCTTTT | AGTGACAGAA  | GACAGGTACT | TGTCATCGTC  | CAGATGATGA  |     |
| APV3_TT25          | .....      | .....      | .....       | .....       | .....      | .....      | .....       | .....      | .....       | .....       |     |
| APV3_TT23_variant1 | .....      | .....      | .....       | .....       | .....      | .....      | .....       | .....      | .....       | .....       |     |
| APV3_TT23_variant2 | .....      | .....      | .....       | .....       | .....      | .....      | .....       | .....      | .....       | .....       |     |
|                    | 201        |            |             |             |            |            |             |            |             |             | 300 |
| APV3_Nanjing       | GGATGGTTTA | AATCGAGTCT | TGGTGATCTG  | ACTATAAAAG  | AGCCAATTGG | CCTAGAACCG | TGGAGAGGCC  | TAAAAGAGTC | CACGTGTCAT  | CTTAGAGCCA  |     |
| APV3_TT25          | .....      | .....      | .....       | .....       | .....TTGG  | CCTAGAACCG | TGGAGAGGCC  | TAAAAGAGTC | CACGTGCCGT  | CTTAGAGTCA  |     |
| APV3_TT23_variant1 | .....      | .....      | ....TGCATG  | AAGGGTAGTT  | TGTGTTTTGG | CCTAGAACCG | TGGAGAGGCC  | TAAAAGAGTC | CACGTGCCGT  | CTTAGAGTCA  |     |
| APV3_TT23_variant2 | .....      | .....      | .....       | .....       | .....      | .....      | .....       | .....      | .....       | .....       |     |
|                    | 301        |            |             |             |            |            |             |            |             |             | 400 |
| APV3_Nanjing       | TTAGGTGTGT | TTTAGTAAAT | ATTAGTAGTT  | TGCACTTCCC  | TGAGTTCCAG | GTCTAGAACC | CAGGAAAGAC  | CCAAAAGAGT | CCTGGTGGGC  | GTTTAGCCAT  |     |
| APV3_TT25          | TAGTATGTGT | CCTAGTAAAT | ATTTGTAGTT  | TCCACTTCCCT | TAGGTTCCAG | GTCTAGAACC | CAGGAGAGAC  | CCAAAAGAGT | CCTGGTTGGC  | GCTTAGCCAC  |     |
| APV3_TT23_variant1 | TAGTATGTGT | CCTAGTAGAT | ATTTGTAGTT  | TCCACTTCCCT | TAGGTTCCAG | GTCTA..... | .....       | .....      | .....       | .....       |     |
| APV3_TT23_variant2 | .....      | .....      | .....       | .....       | .....      | .....      | .....       | .....      | .....       | .....       |     |
|                    | 401        |            |             |             |            |            |             |            |             |             | 500 |
| APV3_Nanjing       | T.....     | .....      | .....       | TTAAAAA     | CCTCTGCACC | TCGTAGGCCA | CACCAACGTC  | AATCATCGTG | TGCCTTATGT  | GGGCAAGTTA  |     |
| APV3_TT25          | AAAGAAGAGA | AAAAGAAAAA | AATTA AAAAG | AAAAGAAAAA  | CCTCTGCATC | GTATAGGCCA | CACCAACGCT  | AATTATAGTG | TGCCCTATGC  | GGGCAAGTTA  |     |
| APV3_TT23_variant1 | .....      | .....      | .....       | .....       | .....      | .....      | .....       | .....      | .....       | .....       |     |
| APV3_TT23_variant2 | .....      | .....      | .....       | .....       | .....      | .....      | .....       | .....      | .....       | .....       |     |
|                    | 501        |            |             |             |            |            |             |            |             |             | 600 |
| APV3_Nanjing       | ACCGTGTGTG | GGCGGCAACC | GGAAACGTTA  | GATGCAAGCG  | TAGATTCATG | AGCTACGTCC | TGTGGTTGGA  | TTTCCACCGT | TATCTCGTCG  | TTAAGAGAGT  |     |
| APV3_TT25          | ACCAGGTTGT | GGCGGCAACC | TGGAATGTCA  | GATGCAAGCG  | TAGATTTATG | AGCTACGCC  | TGTGGTTGGA  | TTTCCACCGT | TATCTCATCG  | TCAAGAGAGC  |     |
| APV3_TT23_variant1 | .....      | .....      | .....       | .....       | .....      | .....      | .....       | .....      | .....       | .....       |     |
| APV3_TT23_variant2 | .....      | .....      | .....       | .....       | .....      | .....      | .....       | .....      | .....       | .....       |     |
|                    | 601        |            |             |             |            |            |             |            |             |             | 700 |
| APV3_Nanjing       | AACCCCTCTT | CTCTCGCTTA | TGGGGGCATC  | GTTAAGCGGG  | CGTGTGACCT | ATTGAAAGGT | GGGTTC CCTA | CGTTAAGGGT | AGTTGTGGTT  | TAGAATAAAC  |     |
| APV3_TT25          | AACCCCTCTT | TTCTCGCTTA | TGGGGGTATT  | GTTAGGCGAG  | CGTGTGATCC | ATTGAAAGAT | GGGTTC CCTG | CGTTAAGGGT | AGTTGTGGTT  | TAGAACA AAC |     |
| APV3_TT23_variant1 | .....      | .....      | .....       | .....       | .....      | .....      | .....       | .....      | .....       | .....       |     |
| APV3_TT23_variant2 | .....      | .....      | .....       | .....       | .....      | .....      | .....       | .....      | .....       | .....       |     |
|                    | 701        |            |             |             |            |            |             |            |             |             | 800 |
| APV3_Nanjing       | CTCCATGGTT | CCGACCTGCC | ATGTTTCAAG  | CGATCGGCAG  | TTCTGGGTAA | GAAACAACCC | TGTGCTTGGT  | GGTTAAGCAT | GACCACTCAG  | TTTGACCAAC  |     |
| APV3_TT25          | CTCCATGGTT | CCGACCTACC | ATGATTA AAG | TGATCGGTAG  | TTCTGGGTAA | GAAACAACCC | TGTGCTTGGT  | GGCTAAGCAT | GACCACTCAG  | TTTGACCGAC  |     |
| APV3_TT23_variant1 | .....      | .....      | .....       | .....       | .....      | .....      | .....       | .....      | .....       | .....       |     |
| APV3_TT23_variant2 | .....      | .....      | .....       | .....       | .....      | .....      | .....       | .....      | .....       | .....       |     |
|                    | 801        |            |             |             |            |            |             |            |             |             | 900 |
| APV3_Nanjing       | TGGACAGACA | GGTTACGTTT | CCCATTTCCG  | TATCAAAAAGT | GGGCGCATAT | CAAAGCGTTA | AATTGCTCAC  | CTGCCAGTTT | TAAACCTTCT  | TTCTG..TG   |     |
| APV3_TT25          | TGGCCAGACA | GGTTACGTTT | CCCACTTCGA  | TATCAAAAAGT | GGGCGCATAT | CAAAGCGTTA | AATTGTTTAC  | TCGCGTGTCT | CAAACCTTCCA | TTCTTGGGTG  |     |

APV3\_TT23\_variant1 .....  
APV3\_TT23\_variant2 ..... TTCTGGGTG

901

1000

APV3\_Nanjing GTTTGGAACA GGCTTCAGTC CTGGTGATCT GACTTTAAAA GAGCCAAATA AACCGCATT CAACGCGTTA TAGTGTTTCGC TGACAGACCG TACAAATAGT  
APV3\_TT25 GTTTGAAATG GGCCTTGGTC CTGGTGATCT GACCTTAAAA GAGCCAAATA AACCGCATT CAACGCGTTA TAGTGTTTCGC TGACAGACCG TACGAATAGT  
APV3\_TT23\_variant1 ..... ..GGTGATCT GACCTTAAAA GAGCCAAATA AACCGCATT CAACGCGTTA TAGTGTTTCGC TGACAGACCG TACGAGTAGT  
APV3\_TT23\_variant2 GTTTGAAATA GGCCTTGGTC CTGGTGATCT GACCTTAAAA GAGCCAAATA AACCGCATT CAACGCGTTA TAGTGTTTCGC TGACAGACCG TACGAGTAGT

1001

1080

APV3\_Nanjing CTGTTTCACC GACCTAAGAC CTAAGTAATT GAATAAGGGA AGGTGATTAA ACAAATTTGC TTTTATCGC TTATTTTCCC  
APV3\_TT25 CTGTTTCACC AACCTAAGAC TTAATAAATT GAATAAGGGG AGGTGATTAA ACAAGTTTGC TTTTATCGC TAATTTTGC.  
APV3\_TT23\_variant1 CTGTTTCACC AACCTAAGAC CTAATAAATT GAATAAGGGG AGGTGATTAA ACAAATTTGC TTTTATCGC TAATTTTCC.  
APV3\_TT23\_variant2 CTGTTTCACC AACCTAAGAC CTAATAAATT GAATAAGGGG AGGTGATTAA ACAAATTTGC TTTTATCGC TAATTTTGT.
